# Supplementary material for: Deubiquitinating enzymes and the proteasome regulate preferential sets of ubiquitin substrates
Source: PubMed Central journal article supplement (PMC9117253; doi:10.1038/s41467-022-30376-7), 2022-05-18

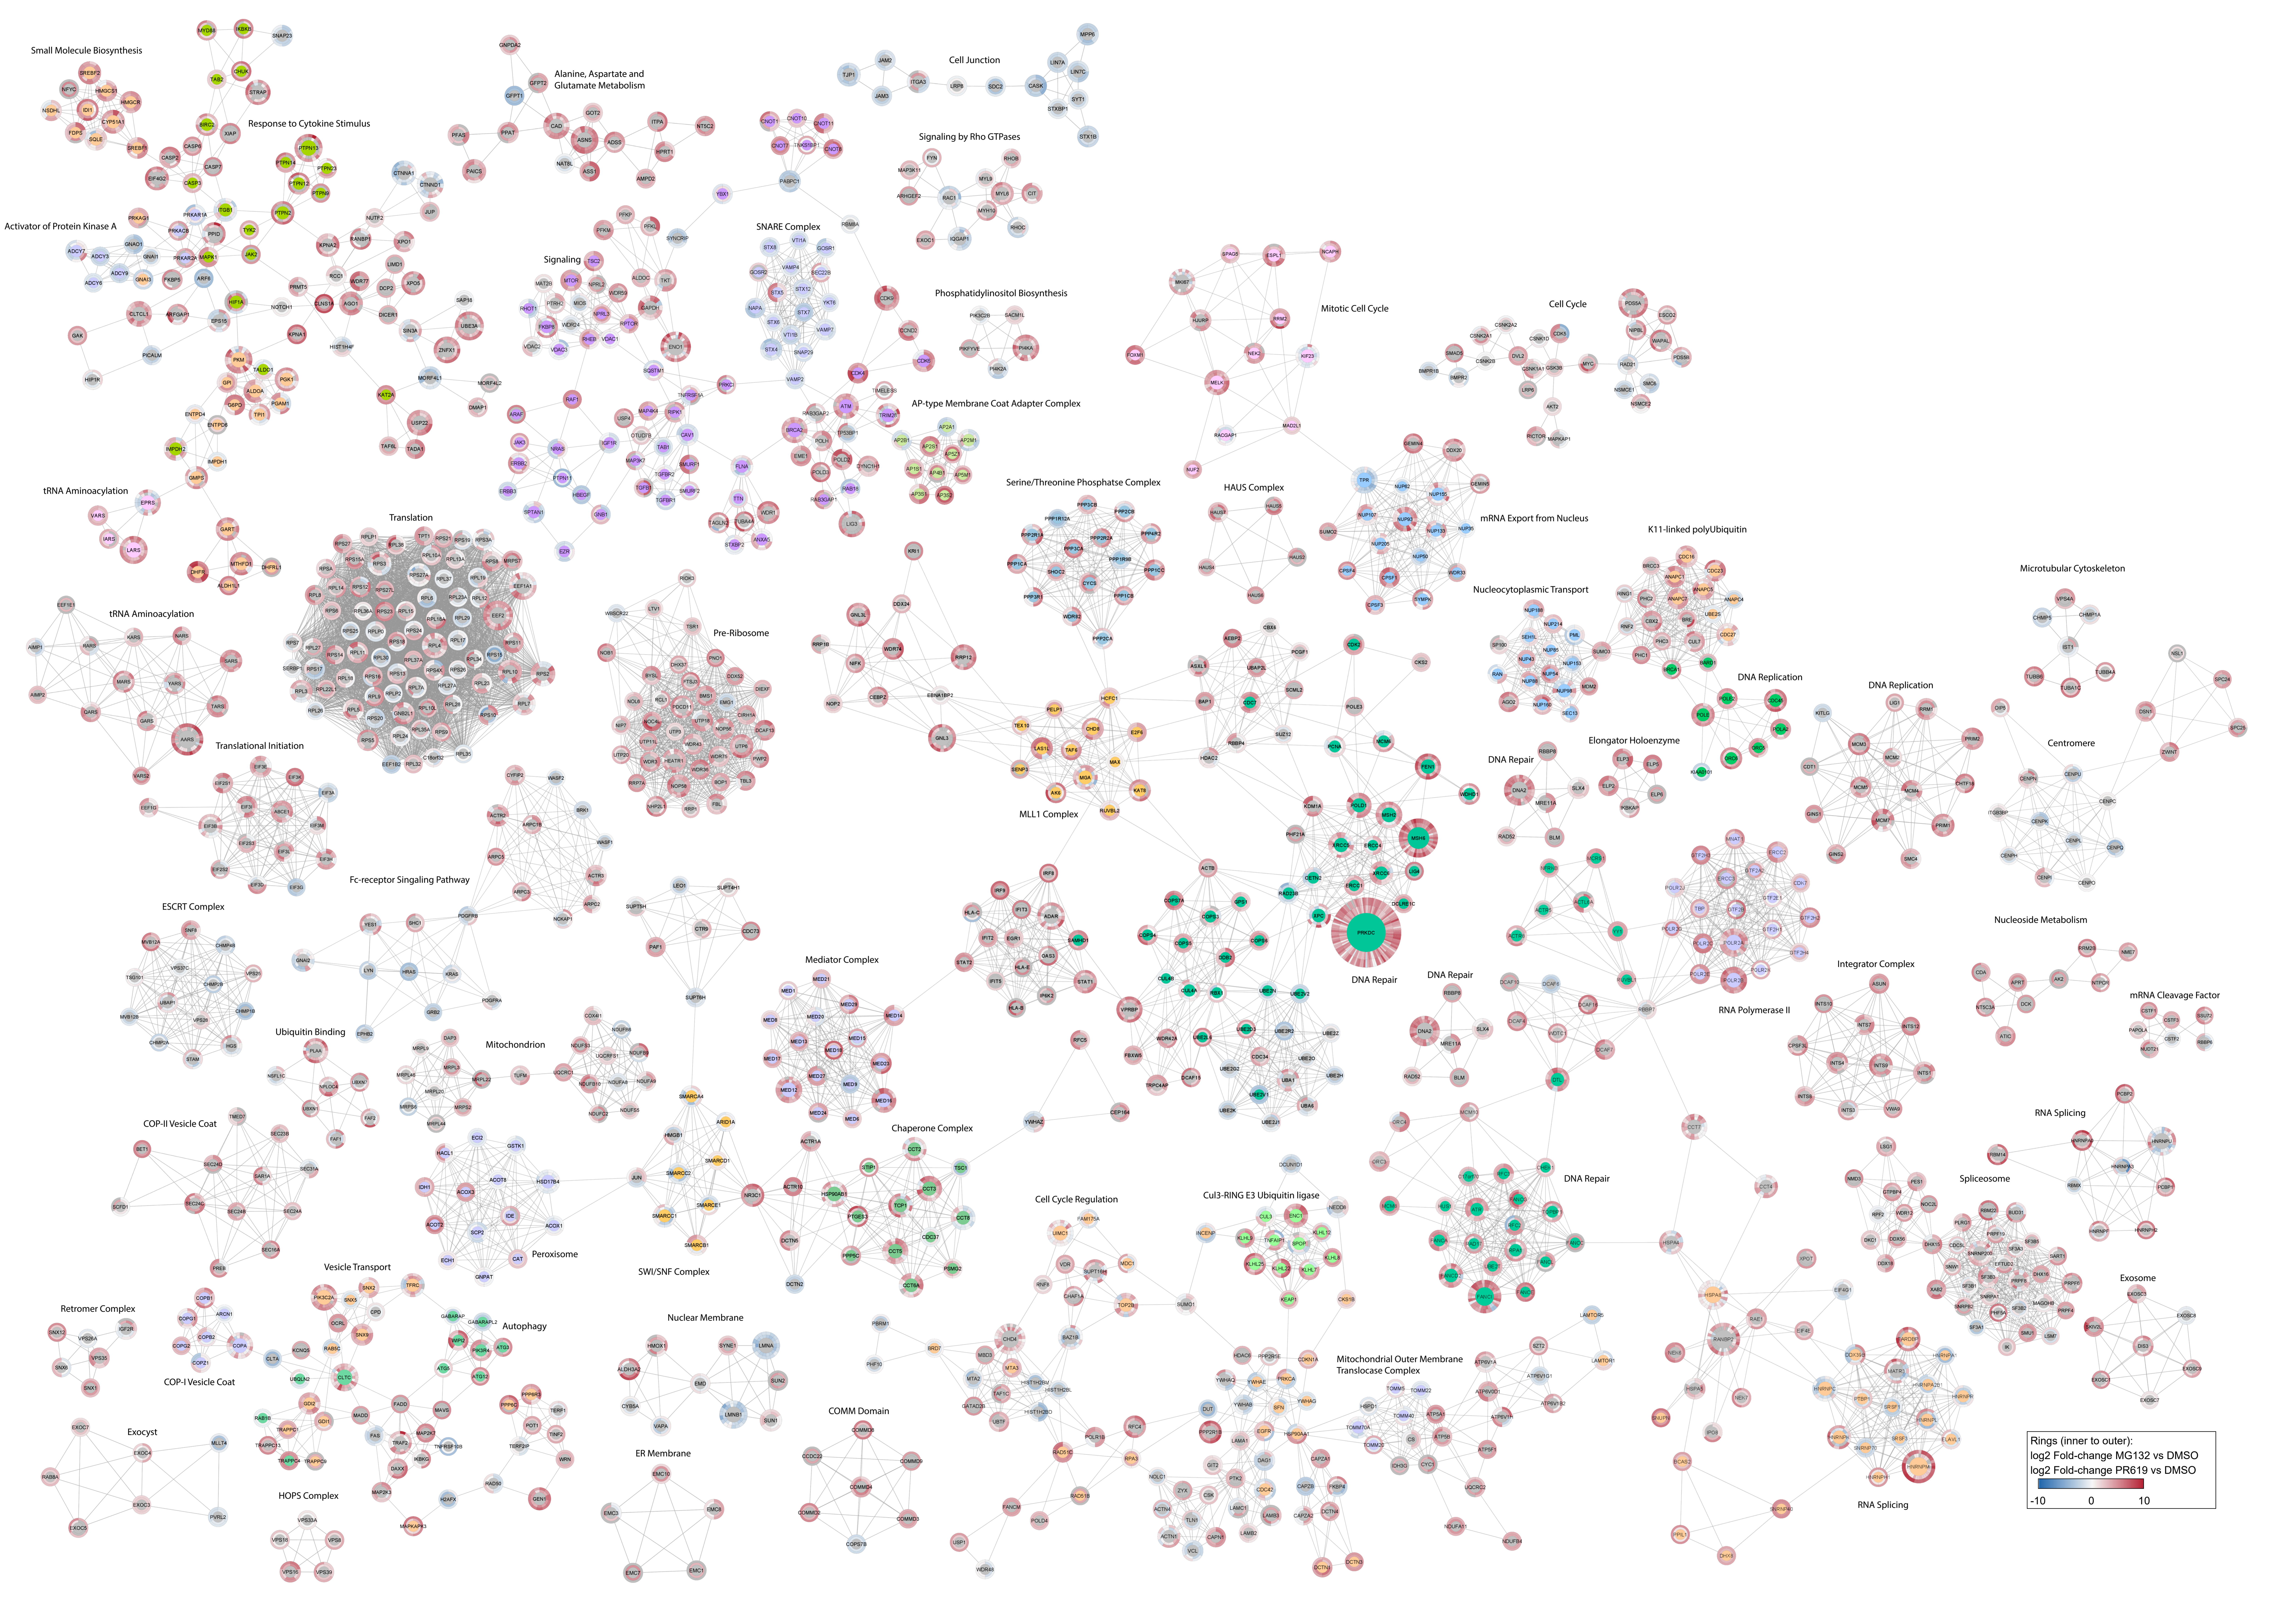

Supplement: 41467_2022_30376_MOESM3_ESM.pdf [file 41467_2022_30376_MOESM3_ESM.pdf]
